# Supplementary material
Source: publisher site journal article supplement (https://www.dovepress.com/article/267492)
Supplement: Supplementary file 1 [file get_supplementary_file.php]

# Supplemental material

# Knowledge, perception, and application of pharmacogenomics among hospital pharmacists in Saudi Arabia

***Mohammed S. Algahtani***

Department of Pharmaceutics, College of Pharmacy, Najran University, Kingdom of Saudi Arabia

corresponding author email: [msalqahtane@nu.edu.sa](mailto:msalqahtane@nu.edu.sa)

## Supplemental material: Knowledge, perception and application of pharmacogenomics survey distributed among hospital pharmacists

## 1: Demographic information

- **Designation**
  - Pharmacist
  - Senior pharmacist
  - Consultant pharmacist
- **Degree**
  - BSc
  - Pharm D
  - MSc
  - PhD
- **Hospital type**
  - Governmental hospital
  - Other governmental hospital
  - Private hospital
- **Number of Years since completing the latest degree**
  - < 2
  - 2-4
  - 5-7
  - 8-10
  - > 10
- **Have you received any formal training or education on pharmacogenomics?**

| - Yes | - No | - Maybe |
| --- | --- | --- |

- **If yes, where the education or training happened?**
  - Pharmacy education
  - Scientific conferences
  - Hospital seminars
  - Continuous medical education (CME)
  - Online courses
  - Saudi FDA sites
  - Past research
  - NIH

## Knowledge regarding pharmacogenomics

- **Are you aware of drug gene interaction in handbooks or clinical decision support?**

| - Yes | - No | - Maybe |
| --- | --- | --- |

- **Genetic determinants of drug response change over person's lifetime**

| - True | - False | - Don’t know |
| --- | --- | --- |

- **The package insert for warfarin includes a warning about altered metabolism in individuals who have specific genetic variants**

| - True | - False | - Don’t know |
| --- | --- | --- |

- **Pharmacogenetic testing is currently available for most medications**

| - True | - False | - Don’t know |
| --- | --- | --- |

- **Pharmacogenomics has an important role in identifying drug-drug interactions**

| - True | - False | - Don’t know |
| --- | --- | --- |

- **Do you think pharmacogenomics influences the patient's adherence to drugs?**

| - Yes | - No | - Maybe |
| --- | --- | --- |

## Perception about Pharmacogenomics

- - **Pharmacogenomics is relevant to my pharmacy practice**

| - Agree | - Neutral | - Disagree |
| --- | --- | --- |

- **Pharmacist should be required to have some knowledge of pharmacogenomics**

| - Agree | - Neutral | - Disagree |
| --- | --- | --- |

- **Pharmacogenetic testing should be applied into my pharmacy practice**

| - Agree | - Neutral | - Disagree |
| --- | --- | --- |

- **Pharmacists should be asked by healthcare professionals for recommendations on appropriate use of pharmacogenetic testing.**

| - Agree | - Neutral | - Disagree |
| --- | --- | --- |

- **I should be able to provide information on appropriate use of pharmacogenetic testing.**

| - Agree | - Neutral | - Disagree |
| --- | --- | --- |

- **Pharmacogenomics will improve our ability to more effectively control drug therapy expenditures.**

| - Agree | - Neutral | - Disagree |
| --- | --- | --- |

- **What are your expectations from pharamacogenetic testing in preventing wrong drug/dose?**

| - Very high | - High | - Low | - No expectation |
| --- | --- | --- | --- |

- **Do you expect that this will reduce the side effects associated with drugs?**

| - Agree | - Neutral | - Disagree |
| --- | --- | --- |

- **Do you feel worried that these tests could reveal that the patient has also risk factors for another disease?**

| - Yes | - No | - Maybe |
| --- | --- | --- |

## Application of Pharmacogenomics in Practice

- **I can identify drugs that need pharmacogenetic testing**

| - Agree | - Neutral | - Disagree |
| --- | --- | --- |

- **I can identify reliable sources of information regarding pharmacogenetics for healthcare professionals and patients**

| - Agree | - Neutral | - Disagree |
| --- | --- | --- |

- **I can readily determine the available pharmacogenetic tests within our healthcare system.**

| - Agree | - Neutral | - Disagree |
| --- | --- | --- |

- **I can accurately apply the results of a pharmacogenetic test to drug therapy selection, dosing, or monitoring.**

| - Agree | - Neutral | - Disagree |
| --- | --- | --- |

- **The pharmacogenetic test required for applying among patients is available in your healthcare institution?**

| - Yes | - No | - Maybe |
| --- | --- | --- |

- **Did you order pharmacogenetic test adoption recently?**

| - Yes | - No | - Maybe |
| --- | --- | --- |

- **If yes, When?**

| - > 6months | - < 6months | - < 1 year |
| --- | --- | --- |

- **If no, what is the reasons that you did not apply it to your practice? (you can select more than one option)**
  - Not requested
  - Time constraints
  - Test is not available
  - Don't know what test needed
- **Does the hospital management know the importance of pharmacogenomics?**

| - Yes | - No | - Don’t know |
| --- | --- | --- |

- **If yes, do they have enough resources required for such practice?**

| - Yes | - No | - Don’t know |
| --- | --- | --- |

- **Is there any standardization of pharmacogenomic practice done by ministry of health or Saudi FDA?**

| - Yes | - No | - Don’t know |
| --- | --- | --- |

- **Does the ministry of health promote the practice of pharmacogenomics?**

| - Yes | - No | - Maybe |
| --- | --- | --- |

- **Does the Saudi FDA promote the practice of pharmacogenomics?**

| - Yes | - No | - Don’t know |
| --- | --- | --- |

- **Is there enough research being done in Saudi for this field?**

| - Yes | - No | - Don’t know |
| --- | --- | --- |

- **Have you conducted or been any part of such research?**

| - Yes | - No | - Don’t know |
| --- | --- | --- |
